# Supplementary material for: Respiratory Syncytial Virus Disease Is Mediated by Age-Variable IL-33
Source: PLOS journal article supplement (doi:10.1371/journal.ppat.1005217), 2015-10-16

Supplemental figure 2: flexiVent analysis of  $\alpha$ IL-33 and rIL-33 treated (non RSV-infected) controls

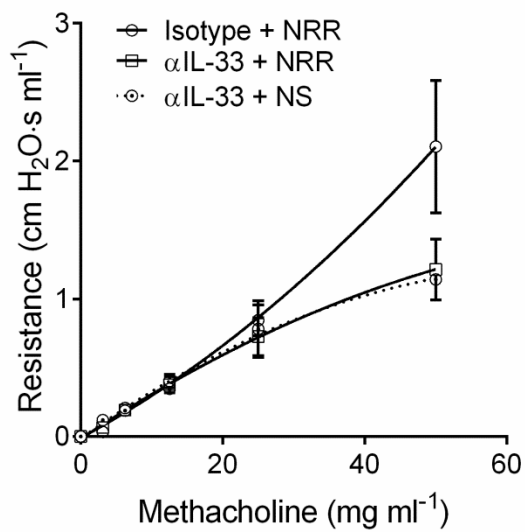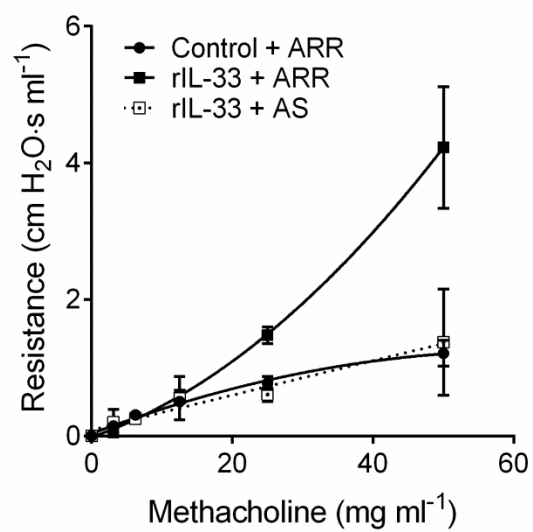

Supplement: S2 (10.1371/journal.ppat.1005217.s002) [file journal.ppat.1005217.s002]
